# Supplementary material for: Galactosyltransferases from Arabidopsis thaliana in the biosynthesis of type II arabinogalactan: molecular interaction enhances enzyme activity
Source: PubMed Central journal article supplement (PMC4234293; doi:10.1186/1471-2229-14-90), 2014-04-03
Supplement: 1471-2229-14-90-S1.pdf [file 1471-2229-14-90-S1.pdf]

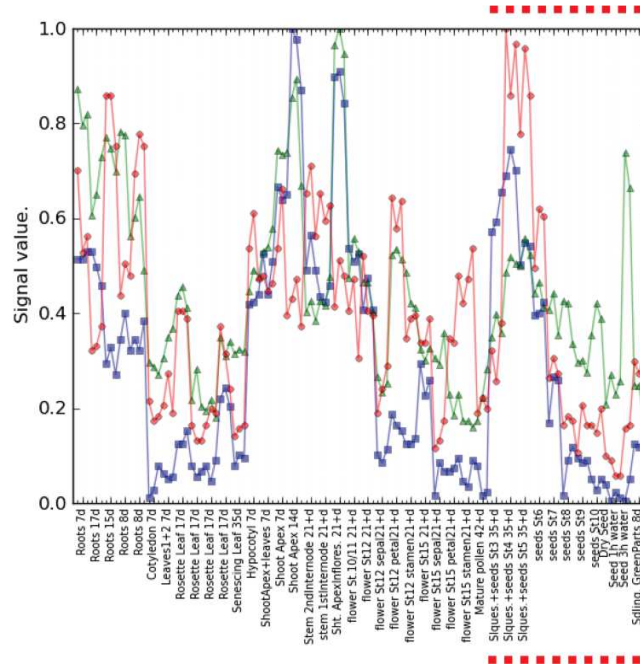

**Figure S1.** Co-expression analysis of *AtGALT29A*, *AtGALT31A* and *AtGlcAT14A*. Expression profiles for *AtGALT29A* (*At1g08280*, ●), *AtGALT31A* (*At1g32930*, ■) and *AtGlcAT14A* (*At5g39990*, ▲) generated by the GeneCAT (<http://genecat.mpg.de>) [1]. The expression level of *AtGALT29A* is higher during seed maturation and root development. *AtGALT29A* is highly co-expressed with *AtGALT31A* during seed maturation (indicated by ■■■).
