# Supplementary material for: Galactosyltransferases from Arabidopsis thaliana in the biosynthesis of type II arabinogalactan: molecular interaction enhances enzyme activity
Source: PubMed Central journal article supplement (PMC4234293; doi:10.1186/1471-2229-14-90), 2014-04-03
Supplement: 1471-2229-14-90-S2.pdf [file 1471-2229-14-90-S2.pdf]

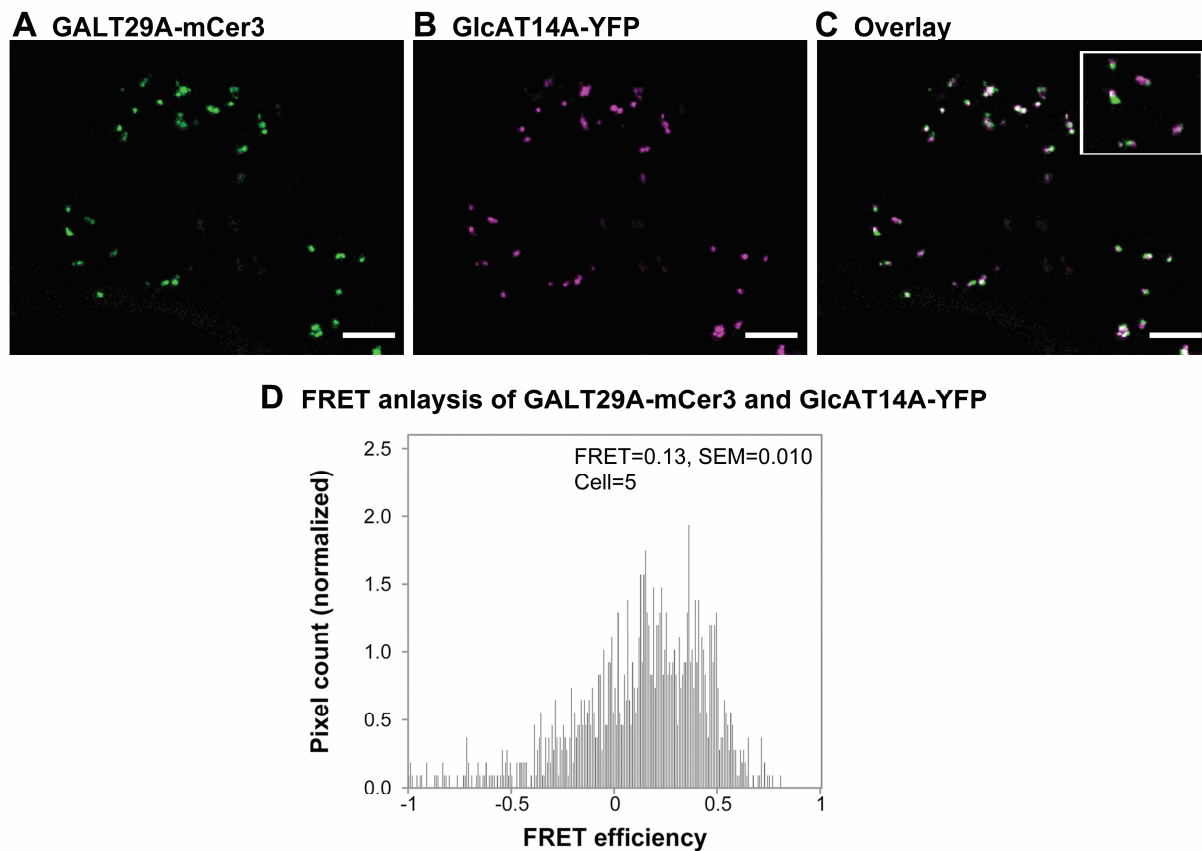

**Figure S2.** Localization and FRET analysis for AtGALT29A and AtGLCAT14A.

**(A-B)** Confocal images of AtGALT29A-mCer3 (A) and AtGLCAT14A-YFP (B) co-expressed in *N. benthamiana* leaves. Scale bar = 5  $\mu$ m.

**(C)** The overlay image of (A) and (B). AtGALT29A-mCer3 and AtGLCAT14A-YFP often show adjacent localization but only occasionally co-localized (inset, region of not co-localized).

**(D)** Distribution histogram for pixel by pixel analysis of FRET [2] for AtGALT29A and AtGLCAT14A where they are co-localized. FRET efficiency is 13%, indicating the two proteins can interact when they are co-localized. SEM, standard error of means; cell=number of cells analyzed.
